# Supplementary material for: Using PPI network autocorrelation in hierarchical multi-label classification trees for gene function prediction
Source: PubMed Central journal article supplement (PMC3850549; doi:10.1186/1471-2105-14-285), 2013-09-26
Supplement: 1471-2105-14-285-S1.pdf [file 1471-2105-14-285-S1.pdf]

**Additional file 1 — Algorithm 2: Pseudo-code of the CLUS-HMC algorithm for top-down induction of HMC trees**

---

**Algorithm 2** Top-down induction of CLUS-HMC

---

```
1: procedure CLUSHMC( $G, U$ ) returns tree
2: if stop( $U$ ) then
3:   return leaf(Prototype( $U$ ))
4: else
5:    $(t^*, h^*, \mathcal{P}^*) = (null, 0, \emptyset)$ 
6:   for each possible Boolean test  $t$  according to the values of attribute  $X$  in dataset  $U$  do
7:      $\mathcal{P} = \{U_1, U_2\}$  partition induced by  $t$  on  $U$ 
8:      $h = Var'(U) - \frac{|U_1| \cdot Var'(U_1) + |U_2| \cdot Var'(U_2)}{|U|}$ 
9:     if  $(h > h^*)$  then
10:       $(t^*, h^*, \mathcal{P}^*) = (t, h, \mathcal{P})$ 
11:    end if
12:  end for
13:   $tree_1 = CLUSHMC(U_1)$ 
14:   $tree_2 = CLUSHMC(U_2)$ 
15:  return node( $t^*, tree_1, tree_2$ )
16: end if
```

---
