# Supplementary material for: Using PPI network autocorrelation in hierarchical multi-label classification trees for gene function prediction
Source: PubMed Central journal article supplement (PMC3850549; doi:10.1186/1471-2105-14-285), 2013-09-26
Supplement: 1471-2105-14-285-S2.pdf [file 1471-2105-14-285-S2.pdf]

### **Additional file 2 — Geary's $C$ for Spatial Regression**

For the task of (single-target) spatial regression [12], where a real-valued response variable  $Y$  has to be predicted, many autocorrelation measures have been defined. Among these measures, the Global Geary's  $C$  [21] is one of the most well-known. It is defined as follows:

$$C_Y = \frac{(N-1) \sum_i \sum_j w_{ij} (y_i - y_j)^2}{2 \sum_{i,j} w_{ij} \sum_i (y_i - \bar{y})^2} \quad (8)$$

where  $N$  is the number of spatial objects indexed by  $i$  and  $j$ ;  $y_i$  and  $y_j$  are the values of the response variable  $Y$  observed for the spatial objects  $o_i$  and  $o_j$ , respectively;  $\bar{y}$  is the overall mean of  $Y$ ; and  $w_{ij}$ ,  $i, j = 1, \dots, N$  are the values of a  $N \times N$  matrix of spatial weights. The values of  $C_Y$  vary in the interval  $[0, 2]$ , where 0 indicates perfect positive autocorrelation (clustered pattern in the data distribution), 1 indicates no autocorrelation (random distribution of the data) and 2 indicates perfect negative autocorrelation (dispersed pattern in the data distribution).
