# Supplementary material for: Using PPI network autocorrelation in hierarchical multi-label classification trees for gene function prediction
Source: PubMed Central journal article supplement (PMC3850549; doi:10.1186/1471-2105-14-285), 2013-09-26
Supplement: 1471-2105-14-285-S3.pdf [file 1471-2105-14-285-S3.pdf]

### Additional file 3 — The performance of the models for predicting FUN annotations

The  $\overline{AUPRC}$  of CLUS-HMC ( $\alpha = 1$ ) and NHMC ( $\alpha = 0.5$  and  $\alpha = 0$ ) when predicting gene function in yeast in terms of FUN annotations. We use 12 yeast (*Saccharomyces cerevisiae*) datasets (as considered by [1]). We consider all genes as well as the subset of highly connected genes (with more than 15 connections). The BioGRID and DIP PPI networks for yeast genes are used.

| Method    | All genes |                |              |                |              | Highly connected genes |                |              |                |              |
|-----------|-----------|----------------|--------------|----------------|--------------|------------------------|----------------|--------------|----------------|--------------|
|           | CLUS-HMC  | DIP            |              | BioGRID        |              | CLUS-HMC               | DIP            |              | BioGRID        |              |
| Dataset   |           | $\alpha = 0.5$ | $\alpha = 0$ | $\alpha = 0.5$ | $\alpha = 0$ |                        | $\alpha = 0.5$ | $\alpha = 0$ | $\alpha = 0.5$ | $\alpha = 0$ |
| seq       | 0.059     | 0.054          | 0.053        | 0.056          | 0.062        | 0.051                  | 0.094          | 0.130        | 0.051          | 0.058        |
| pheno     | 0.036     | 0.035          | 0.028        | 0.028          | 0.028        | 0.068                  | 0.333          | 0.333        | 0.064          | 0.064        |
| struc     | 0.030     | 0.020          | 0.020        | 0.020          | 0.020        | 0.093                  | 0.088          | 0.093        | 0.093          | 0.093        |
| homo      | 0.073     | 0.020          | 0.023        | 0.020          | 0.020        | 0.149                  | 0.088          | 0.088        | 0.088          | 0.088        |
| cellcycle | 0.032     | 0.030          | 0.037        | 0.020          | 0.029        | 0.047                  | 0.098          | 0.125        | 0.034          | 0.050        |
| church    | 0.029     | 0.020          | 0.020        | 0.020          | 0.020        | 0.041                  | 0.091          | 0.091        | 0.033          | 0.033        |
| derisi    | 0.027     | 0.028          | 0.025        | 0.020          | 0.026        | 0.048                  | 0.098          | 0.119        | 0.048          | 0.093        |
| eisen     | 0.047     | 0.042          | 0.025        | 0.024          | 0.037        | 0.067                  | 0.147          | 0.183        | 0.039          | 0.069        |
| gasch1    | 0.036     | 0.040          | 0.032        | 0.033          | 0.036        | 0.060                  | 0.103          | 0.124        | 0.062          | 0.063        |
| gasch2    | 0.034     | 0.034          | 0.027        | 0.025          | 0.028        | 0.037                  | 0.108          | 0.112        | 0.051          | 0.052        |
| spo       | 0.030     | 0.029          | 0.025        | 0.020          | 0.027        | 0.044                  | 0.049          | 0.134        | 0.034          | 0.051        |
| exp       | 0.040     | 0.030          | 0.025        | 0.020          | 0.028        | 0.067                  | 0.091          | 0.132        | 0.029          | 0.027        |
| Average:  | 0.039     | 0.032          | 0.028        | 0.026          | 0.030        | 0.064                  | 0.116          | 0.139        | 0.052          | 0.062        |
