# Supplementary material for: Using PPI network autocorrelation in hierarchical multi-label classification trees for gene function prediction
Source: PubMed Central journal article supplement (PMC3850549; doi:10.1186/1471-2105-14-285), 2013-09-26
Supplement: 1471-2105-14-285-S4.pdf [file 1471-2105-14-285-S4.pdf]

#### Additional file 4 — The performance of NHMC and other methods in predicting FUN annotations of yeast genes

The  $AUPRC$  of models learned by HMC-GA, HMC-LMLP, hmAnt-Miner and NHMC (using  $\alpha = 0.5$  and the DIP PPI network), for 7 FUN annotated yeast datasets, as used in Cerri et al. [33].

| Dataset/Method | HMC-GA | HMC-LMLP | hmAnt-Miner | NHMC ( $\alpha = 0.5$ ) |
|----------------|--------|----------|-------------|-------------------------|
| pheno          | 0.148  | 0.085    | 0.162       | 0.241                   |
| celcycle       | 0.150  | 0.144    | 0.154       | 0.173                   |
| church         | 0.149  | 0.140    | 0.168       | 0.152                   |
| derisi         | 0.152  | 0.138    | 0.161       | 0.172                   |
| eisen          | 0.165  | 0.173    | 0.180       | 0.196                   |
| gasch2         | 0.151  | 0.132    | 0.163       | 0.186                   |
| spo            | 0.151  | 0.139    | 0.174       | 0.181                   |
